# Supplementary material for: A perovskite oxide with a tunable pore-size derived from a general salt-template strategy as a highly efficient electrocatalyst for the oxygen evolution reaction
Source: Royal Society of Chemistry journal article supplement (doi:10.1039/c8cc10181g), 2019-01-01
Supplement: c8cc10181g1.pdf [file c8cc10181g1.pdf]

Electronic Supplementary Material (ESI) for ChemComm.  
This journal is © The Royal Society of Chemistry 2018

## Electronic Supplementary Information

### **Perovskite Oxide with Tunable Pore-Size Derived from a General Salt-Template Strategy as Highly Efficient Electrocatalyst for Oxygen Evolution Reaction**

Haoran Yu,<sup>a</sup> Fuqiang Chu,<sup>a</sup> Xiao Zhou,<sup>a</sup> Junling Ji<sup>\*, a</sup>, Yang Liu,<sup>a</sup> Yunfei Bu,<sup>\*, b</sup>  
Yong Kong,<sup>a</sup> Yongxin Tao,<sup>a</sup> Yongxin Li,<sup>a</sup> Yong Qin<sup>\*, a</sup>

<sup>a</sup> Jiangsu Key Laboratory of Advanced Catalytic Materials and Technology, School of Petrochemical Engineering, Changzhou University, Changzhou 213164, China

<sup>b</sup> School of Environmental Science and Engineering, Nanjing University of Information Science & Technology, Nanjing, Jiangsu, 210044, China

\*Corresponding authors:

E-mail: jijunling@cczu.edu.cn

E-mail: jpu441@yahoo.com

E-mail: qinyong@cczu.edu.cn

## Experimental Section

### *Fabrication of Materials*

The fabrication of porous perovskite oxide was performed by an inorganic salt-template strategy. Firstly, the  $\text{PrBa}_{0.5}\text{Sr}_{0.5}\text{Co}_{1.5}\text{Fe}_{0.5}\text{O}_{5+\delta}$  (PBSCF) gel were prepared via a sol-gel method. Stoichiometric amounts of  $\text{Pr}(\text{NO}_3)_3 \cdot 6\text{H}_2\text{O}$  (0.50 mmol),  $\text{Ba}(\text{NO}_3)_2$  (0.25 mmol),  $\text{Sr}(\text{NO}_3)_2$  (0.25 mmol),  $\text{Co}(\text{NO}_3)_2 \cdot 6\text{H}_2\text{O}$  (0.75 mmol), and  $\text{Fe}(\text{NO}_3)_3 \cdot 9\text{H}_2\text{O}$  (0.25 mmol) were dissolved in 3.6 mL deionized water to get a transparent solution, then, 2.4 mmol citric acid and 0.167 mL ethylene glycol were added into the solution. The mixture was heated at 70 °C for 2 hours to produce a viscous gel under magnetic stirring. Secondly, the gel was mixed with 20 g anhydrous  $\text{K}_3\text{PO}_4$  powder which had been dried prior to use. The free water in the gel was absorbed by anhydrous  $\text{K}_3\text{PO}_4$  to form hydrate  $\text{K}_3\text{PO}_4$ , while the gel was transformed into xerogel monolith. The xerogel monolith was first dried in oven, and then calcined at 600 °C for 4 hours following 900 °C for 4 hours in air. Finally, the calcined monolith was immersed in water to dissolve the  $\text{K}_3\text{PO}_4$  template. The remained sediment was centrifuged, and washed with water. After dried at 70 °C overnight, the final porous PBSCF was obtained and denoted as p-PBSCF. The fabrication of bulk PBSCF (b-PBSCF) was basically identical to that of p-PBSCF, except that the gel was dried and calcined directly, but need not use the anhydrous  $\text{K}_3\text{PO}_4$  template. Similarly, the bulk and porous BSCF and LSC were prepared, labeled as b-BSCF, b-LSC, p-BSCF, and p-LSC.

### *Characterization*

The powder X-ray diffraction (XRD, Rigaku D/max 2500PC diffractometer, Cu-K $\alpha$  radiation) were used to confirm the crystalline phase of samples. The microstructure and morphology of p-PBSCF were observed by a field-emission scanning electron microscope (FESEM, Zeiss,

Germany) and transmission electron microscopy (TEM, JEOL JEM-2100F), and scanning transmission electron microscopy (STEM) fixed with a high-angle-annular-dark-field (HAADF) detector at 300 kV. Chemical analysis of the materials was accomplished by X-ray photoelectron spectroscopy (XPS, ESCALAB 250Xi, Thermo Fisher Scientific, USA). The Brunauer-Emmett-Teller (BET) surface area and pore distribution of the materials was measured using the N<sub>2</sub> adsorption/desorption analyzer (Micromeritics, USA). The electrochemical measurements including cyclic voltammetry and linear sweep voltammetry (LSV) were implemented on a CHI 660D electrochemical workstation interfaced with a rotating disk electrode (RDE, Pine Cooperation, USA).

#### *Electrochemical measurements*

The electrochemical measurements were conducted in an electrochemical cell equipped with the conventional three-electrode system. Typically, the rotating disk electrode (RDE) with the diameter of 3 mm (0.07 cm<sup>2</sup> in geometric area) was used as the working electrode. Pt plate electrode and the saturated calomel electrode (SCE) served as the counter electrode and the reference electrode, respectively. The catalyst ink was prepared by ultrasonically dispersing 4.0 mg catalyst, 1.0 mg conductive carbon black, and 20.0  $\mu$ L Nafion solution (5 wt.%) in a mixed solvent containing 1.5 mL deionized water and 0.5 mL isopropanol. Then, 7  $\mu$ L of catalyst ink was dropped onto RDE, which was dried in air at room temperature for 4 h to construct the work electrode. The loading of catalyst on the RDE is calculated to be 0.2 mg cm<sup>-2</sup>. The potential versus SCE was converted into the corresponding potential versus reversible hydrogen electrode (RHE) according the equation  $E_{\text{vs RHE}} = E_{\text{vs SCE}} + E^{\theta}_{\text{SCE}} + 0.059 \text{ pH}$  [1]. All potentials were iR-corrected to compensate the effect of solution resistance [2]. 0.1 M KOH aqueous solution (pH=13) was used as the electrolyte. To ensure the equilibrium potential of O<sub>2</sub>/H<sub>2</sub>O at 1.23 V

versus RHE, the electrolyte was saturated with O<sub>2</sub> for 20 minutes prior to use [3]. LSV measurements were performed with RDE at the rotation speed of 1600 rpm and scan rate of 10 mV s<sup>-1</sup> from 1.2 V to 1.8 V versus RHE. The current-time tests were carried out at the current density of 10 mA cm<sup>-2</sup>.

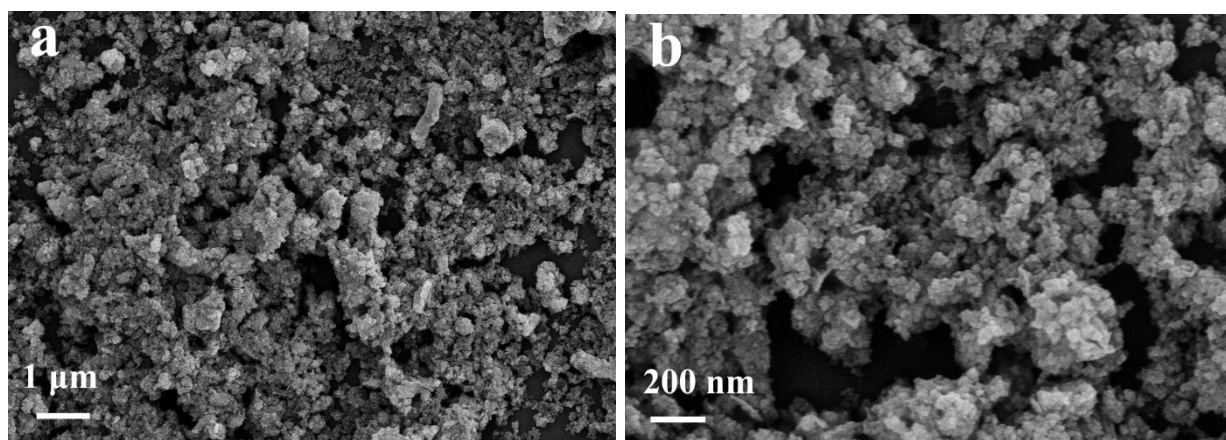

**Fig. S1** SEM images of p-PBSCF

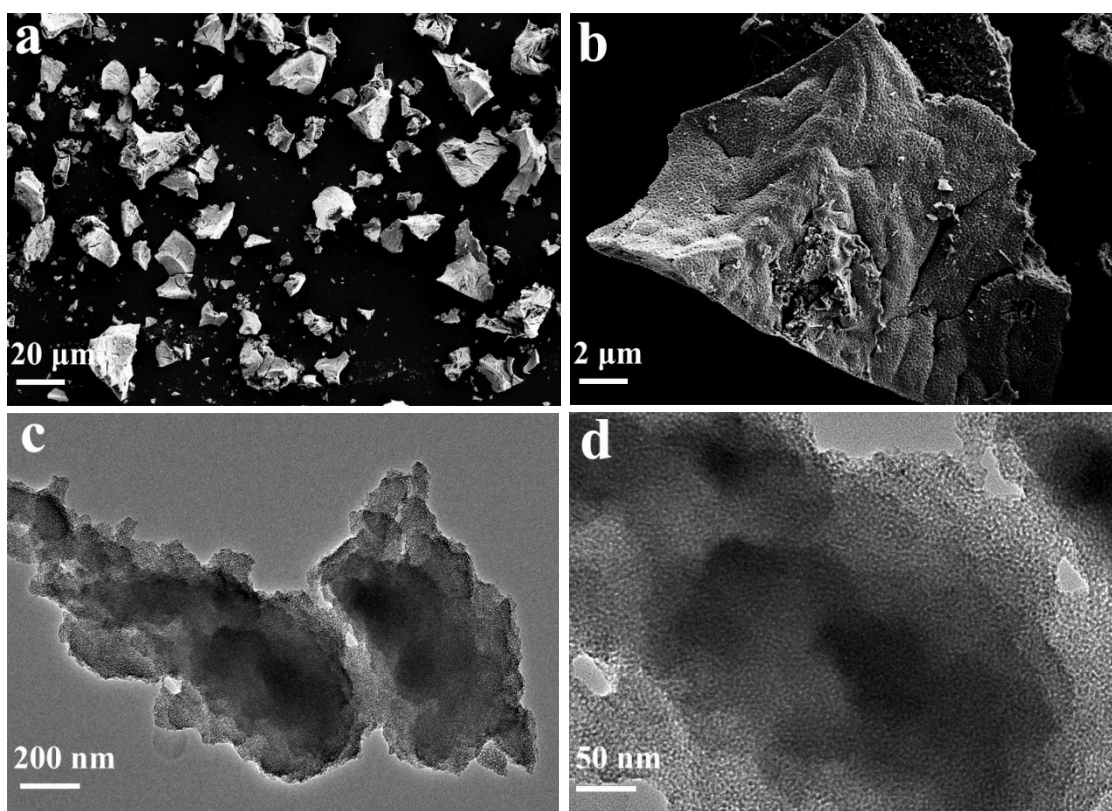

**Fig.S2** SEM (a, b) and TEM (c, d) images of b-PBSCF.

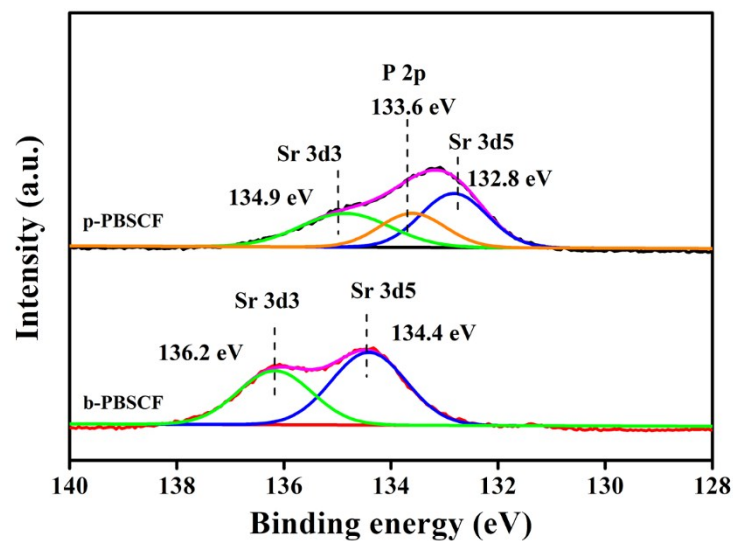

**Fig.S3** The P 2p and Sr 3d XPS of the p-PBSCF and b-PBSCF.

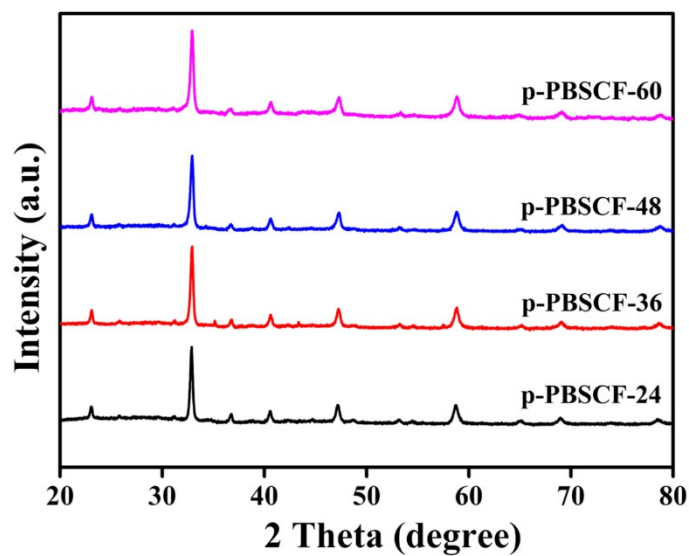

**Fig. S4** The XRD patterns of p-PBSCF fabricated by various amount of  $K_3PO_4$  template.

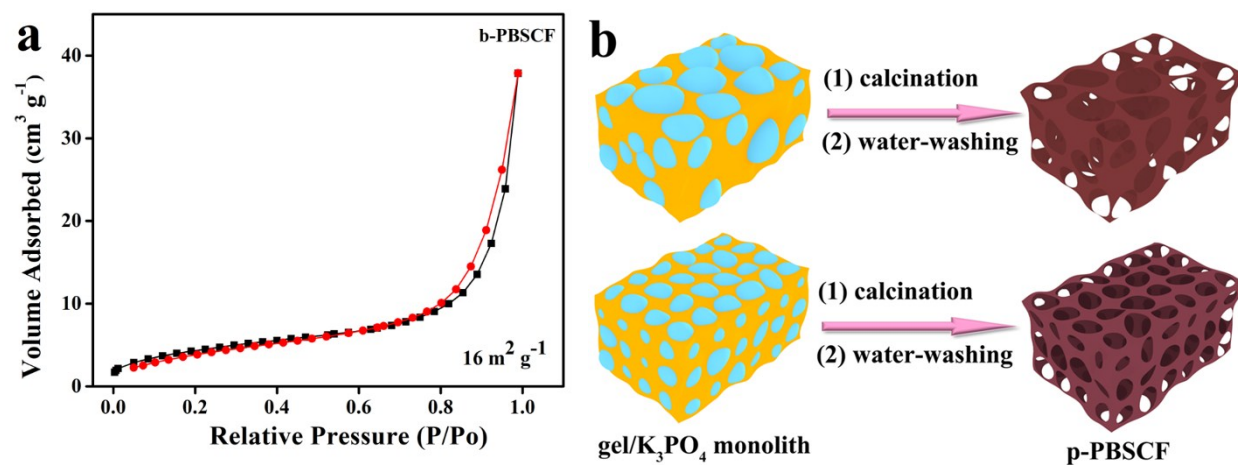

**Fig.S5** (a)  $\text{N}_2$  adsorption-desorption isotherms of the b-PBSCF, (b) mechanism of the pore size tuned by  $\text{K}_3\text{PO}_4$  template, the high (up) and low (down) amount of  $\text{K}_3\text{PO}_4$  added.

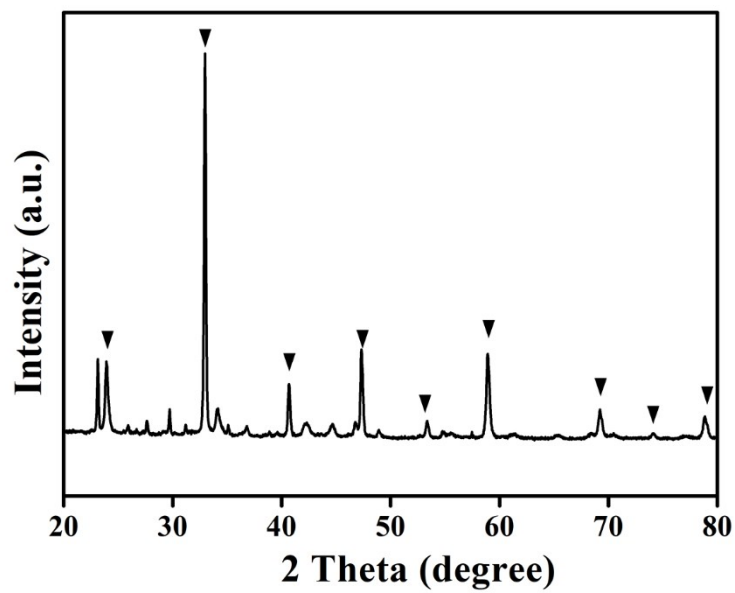

**Fig. S6** XRD of p-PBSCF fabricated by  $\text{BaCl}_2$  template.



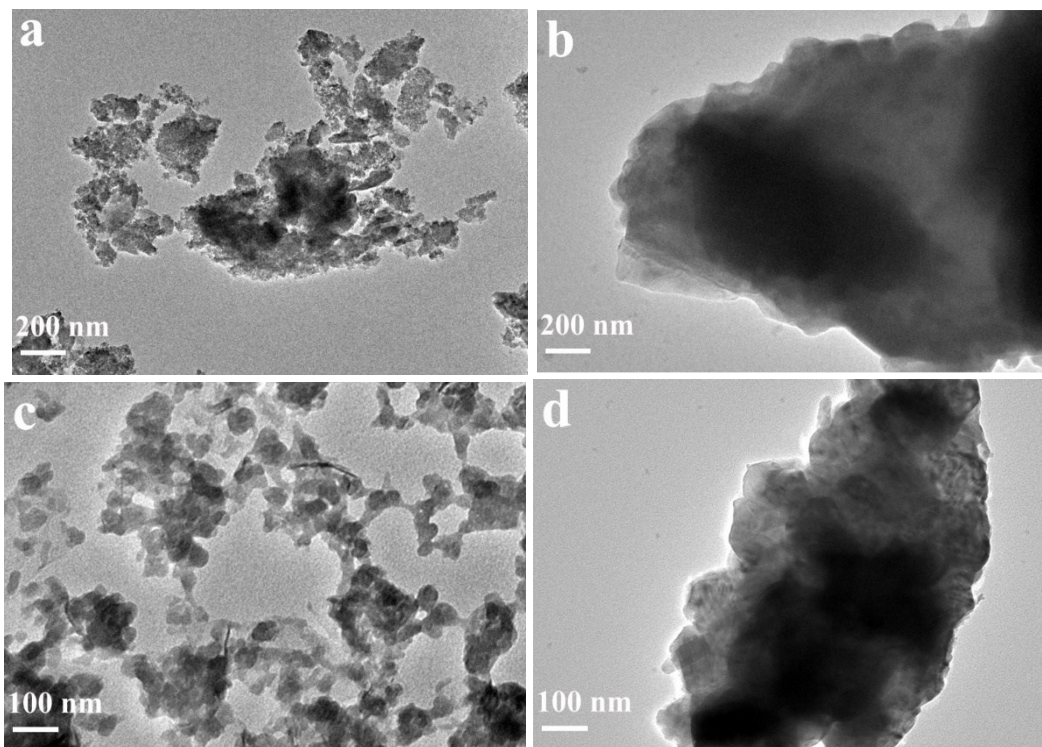

**Fig. S7** TEM images of p-LSC (a), b-LSC (b), p-BSCF (c), and b-BSCF (d).

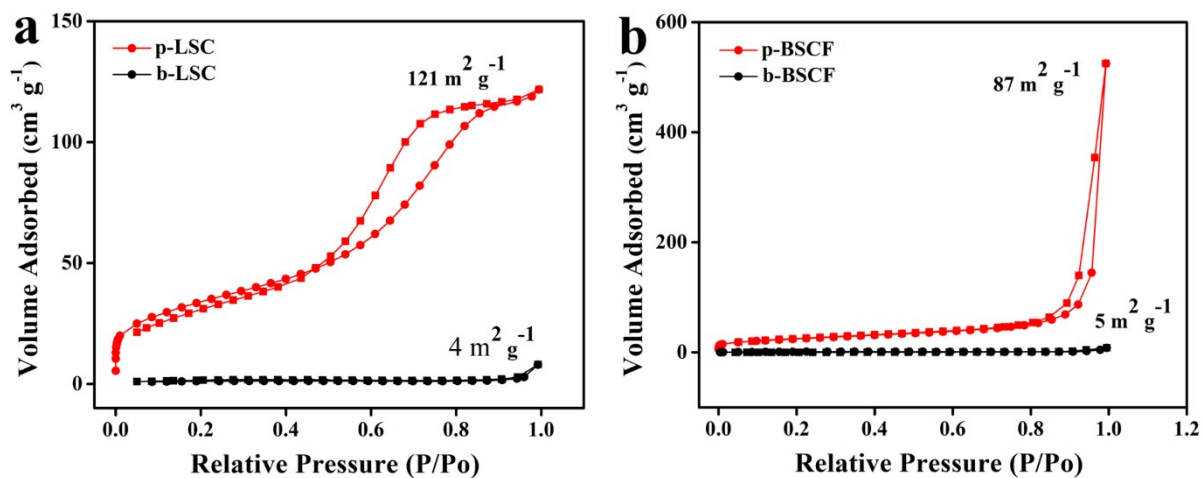

**Fig. S8**  $\text{N}_2$  adsorption-desorption isotherm of p-LSC, b-LSC, p-BSCF, and b-BSCF.



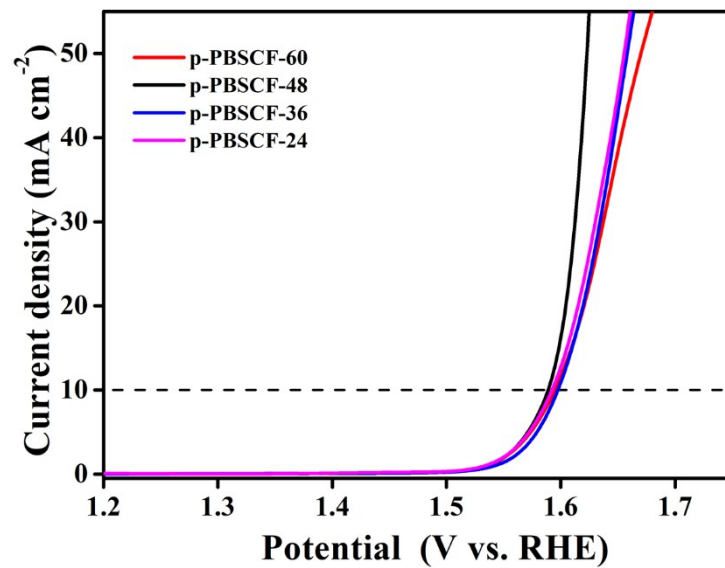

**Fig. S9** OER activity of the p-PBSCF fabricated with various amount of  $K_3PO_4$  template.

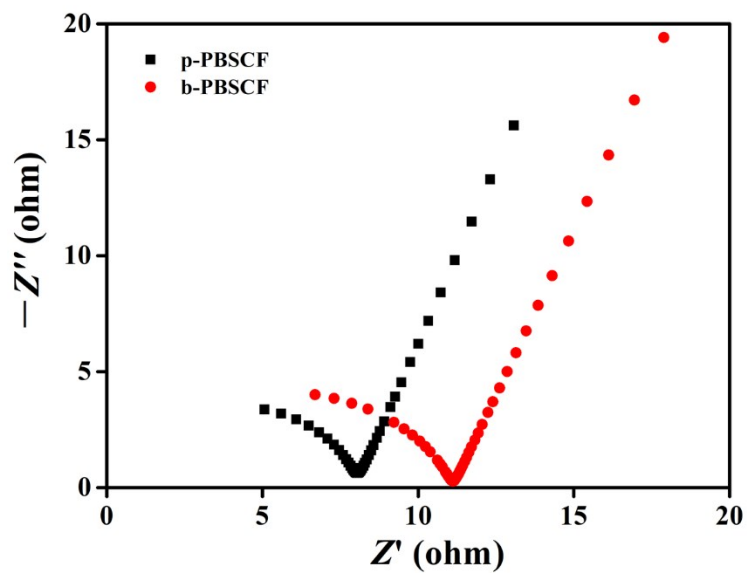

**Fig. S10** EIS of p-PBSCF and the b-PBSCF.

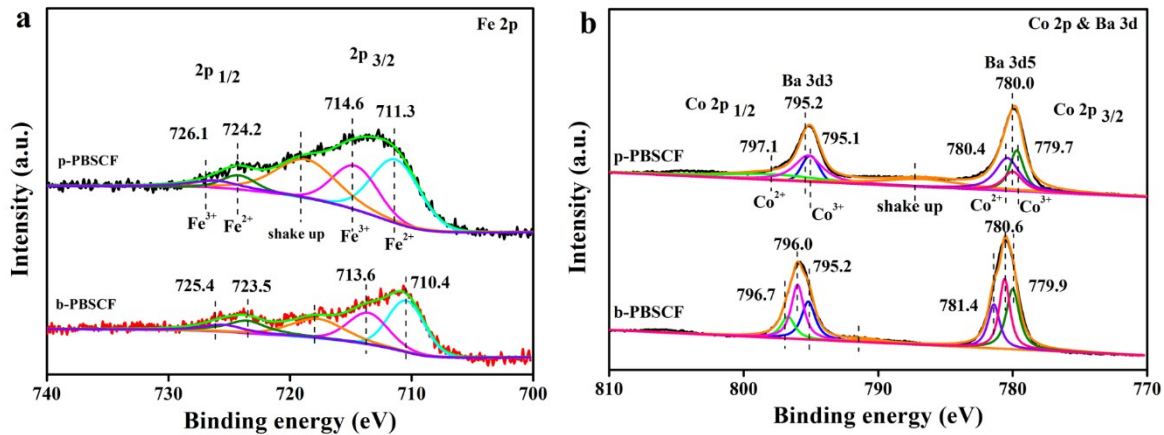

**Fig. S11** The fine XPS of Fe 2p and Co 2p of P-PBSCF and b-PBSCF. After P-doping, Fe and Co shift to the higher valence state significantly.

**Tab. S1** The comparison of the BET surface area of our fabricated p-PBSCF with those reported in literature.

| Sample                                                                                                                       | Method                 | Template                       | BET (m <sup>2</sup> g <sup>-1</sup> ) | Ref.      |
|------------------------------------------------------------------------------------------------------------------------------|------------------------|--------------------------------|---------------------------------------|-----------|
| p-PBSCF                                                                                                                      | Hard template          | K <sub>3</sub> PO <sub>4</sub> | 148                                   | This work |
| La <sub>0.6</sub> Sr <sub>0.4</sub> MnO <sub>3</sub>                                                                         | Hard template          | PMMA                           | 42.1                                  | [4]       |
| LaFeCoO <sub>3</sub>                                                                                                         | Hard template          | Porous carbon                  | 49.3                                  | [5]       |
| LaMnO <sub>3</sub>                                                                                                           | Hard template          | KIT-6                          | 45                                    | [6]       |
| LaMnO <sub>3</sub>                                                                                                           | Hard and soft template | Lysine-aided                   | 37.8                                  | [7]       |
| 3DOM-m La <sub>0.7</sub> Ce <sub>0.3</sub> CoO <sub>3</sub>                                                                  | Hard and soft template | PMMA and P123                  | 35.4                                  | [8]       |
| La <sub>0.6</sub> Sr <sub>0.4</sub> Co <sub>0.2</sub> Fe <sub>0.8</sub> O <sub>3</sub>                                       | Soft template          | F-127                          | 30                                    | [9]       |
| LaMnO <sub>3</sub>                                                                                                           | Soft template          | CTBA                           | 50                                    | [9]       |
| La <sub>0.7</sub> (Ba <sub>0.5</sub> Sr <sub>0.5</sub> ) <sub>0.3</sub> Co <sub>0.8</sub> Fe <sub>0.2</sub> O <sub>3-δ</sub> | Sol-gel                |                                | 21.9                                  | [10]      |
| La <sub>0.6</sub> Sr <sub>0.4</sub> MnO <sub>3</sub>                                                                         | Sol-gel                |                                | 42.1                                  | [11]      |
| LaFeO <sub>3</sub>                                                                                                           | Hydrothermal           |                                | 25.8                                  | [12]      |
| SrNb <sub>0.1</sub> Co <sub>0.7</sub> Fe <sub>0.2</sub> O <sub>3-δ</sub>                                                     | Electrospinning        |                                | 45                                    | [2]       |
| (La <sub>0.6</sub> Sr <sub>0.4</sub> ) <sub>0.95</sub> Co <sub>0.2</sub> Fe <sub>0.8</sub> O <sub>3+δ</sub>                  | Electrospinning        |                                | 17.96                                 | [13]      |
| PrBa <sub>0.5</sub> Sr <sub>0.5</sub> Co <sub>1.5</sub> Fe <sub>0.5</sub> O <sub>5+δ</sub>                                   | Electrospinning        |                                | 18.81                                 | [3]       |

**Tab. S2** Comparison of OER performance in 0.1M KOH.

| Catalyst                                                                                                   | Tafel slope<br>(mV dec <sup>-1</sup> ) | $\eta$ 10<br>(mV) | Catalyst loading<br>(mg cm <sup>-2</sup> ) | Ref.      |
|------------------------------------------------------------------------------------------------------------|----------------------------------------|-------------------|--------------------------------------------|-----------|
| p-PBSCF                                                                                                    | 56                                     | 359               | 0.2                                        | This work |
| P-doped LaFeO <sub>3-<math>\delta</math></sub>                                                             | 50                                     | 460               | 0.255                                      | [14]      |
| BaCo <sub>0.8</sub> Zr <sub>0.1</sub> Y <sub>0.1</sub> O <sub>3</sub>                                      | 83                                     | 420               | 0.232                                      | [15]      |
| LP-LaSr <sub>3</sub> Co <sub>1.5</sub> Fe <sub>1.5</sub> O <sub>10-<math>\delta</math></sub>               | 83.9                                   | 388               | 0.255                                      | [16]      |
| La <sub>0.95</sub> FeO <sub>3-<math>\delta</math></sub>                                                    | 48                                     | 410               | 0.232                                      | [17]      |
| SrCo <sub>0.9</sub> Ti <sub>0.1</sub> O <sub>3-<math>\delta</math></sub>                                   | 88                                     | 510               | 0.32                                       | [18]      |
| Ba <sub>0.5</sub> Sr <sub>0.5</sub> Co <sub>0.8</sub> Fe <sub>0.2</sub> O <sub>3-<math>\delta</math></sub> | 94                                     | 500               | 0.232                                      | [19]      |
| SrNb <sub>0.1</sub> Co <sub>0.7</sub> Fe <sub>0.2</sub> O <sub>3-<math>\delta</math></sub>                 | 76                                     | 500               | 0.232                                      | [19]      |
| LaCoO <sub>3</sub>                                                                                         | 69                                     | 490               | 0.25                                       | [20]      |

## Reference

- [1] S. Wang, L. Zhang, Y. Qin, D. Ding, Y. Bu, F. Chu, Y. Kong and M. Liu, *J. Power Sources*, 2017, **363**, 260.
- [2] Y. Zhu, W. Zhou, Y. Zhong, Y. Bu, X. Chen, Q. Zhong, M. Liu and Z. Shao, *Adv. Energy Mater.*, 2017, **7**, 1602122.
- [3] B. Zhao, L. Zhang, D. Zhen, S. Yoo, Y. Ding, D. Chen, Y. Chen, Q. Zhang, B. Doyle, X. Xiong and M. Liu, *Nat. Commun.*, 2017, **8**, 14586.
- [4] H. Arandiyana, H. Dai, J. Deng, Y. Wang, S. Xie and J. Li, *Chem. Commun.*, 2013, **49**, 10748.
- [5] H. Zhu, P. Zhang and S. Dai, *ACS Catal.*, 2015, **5**, 6370.
- [6] Z. Sarshar, F. Kleitz and S. Kaliaguine, *Energy Environ. Sci.*, 2011, **4**, 4258.
- [7] Y. Liu, H. Dai, Y. Du, J. Deng, L. Zhang and Z. Zhao, *Appl. Catal., B*, 2012, **119-120**, 20.
- [8] H. Arandiyana, J. Scott, Y. Wang, H. Dai, H. Sun and R. Amal, *ACS Appl. Mater. Interfaces*, 2016, **8**, 2457.
- [9] R. Chao, R. Munprom, R. Petrova, K. Gerdes, J. R. Kitchin, P. A. Salvador and J. Stevenson, *J. Am. Ceram. Soc.*, 2012, **95**, 2339.
- [10] J. I. Jung, M. Risch, S. Park, M. G. Kim, G. Nam, H. Y. Jeong, Y. Shao-Horn and J. Cho, *Energy Environ. Sci.*, 2016, **9**, 176.
- [11] H. Arandiyana, H. Dai, J. Deng, Y. Liu, B. Bai, Y. Wang, X. Li, S. Xie and J. Li, *J. Catal.*, 2013, **307**, 327.
- [12] K. Ji, H. Dai, J. Deng, L. Song, S. Xie and W. Han, *J. Solid State Chem.*, 2013, **199**, 164.
- [13] Y. Chen, Y. Bu, Y. Zhang, R. Yan, D. Ding, B. Zhao, S. Yoo, D. Dang, R. Hu, C. Yang and M. Liu, *Adv. Energy Mater.*, 2017, **7**, 1601890.

- [14] Z. Li, L. Lv, J. Wang, X. Ao, Y. Ruan, D. Zha, G. Hong, Q. Wu, Y. Lan, C. Wang, J. Jiang and M. Liu, *Nano Energy*, 2018, **47**, 199-209.
- [15] H. Liu, J. Yu, J. Sunarso, C. Zhou, B. Liu, Y. Shen, W. Zhou and Z. Shao, *Electrochim. Acta*, 2018, **282**, 324-330.
- [16] S. Liu, H. Luo, Y. Li, Q. Liu and J.-L. Luo, *Nano Energy*, 2017, **40**, 115-121.
- [17] Y. Zhu, W. Zhou, J. Yu, Y. Chen, M. Liu and Z. Shao, *Chem. Mater.*, 2016, **28**, 1691-1697.
- [18] C. Su, W. Wang, Y. Chen, G. Yang, X. Xu, M. O. Tadé and Z. Shao, *ACS Appl. Mater. Interfaces*, 2015, **7**, 17663-17670.
- [19] Y. Zhu, W. Zhou, Z.-G. Chen, Y. Chen, C. Su, M. O. Tadé and Z. Shao, *Angew. Chem. Int. Edit.*, 2015, **54**, 3897-3901.
- [20] S. Zhou, X. Miao, X. Zhao, C. Ma, Y. Qiu, Z. Hu, J. Zhao, L. Shi and J. Zeng, *Nat. Commun.*, 2016, **7**, 11510.
